# Supplementary material for: Olive Mill Waste Enhances α-Glucan Content in the Edible Mushroom Pleurotus eryngii
Source: PubMed Central journal article supplement (PMC5536052; doi:10.3390/ijms18071564), 2017-07-18
Supplement: ijms-18-01564-s001.pdf [file ijms-18-01564-s001.pdf]

**Table S1.** Weight ratio between caps and stalks in *Pleurotus Eryngii*.

| <b>Treatment</b>             | <b>Caps (Wet Weight)</b> | <b>Stalks (Wet Weight)</b> | <b>Caps (Dried Weight)</b> | <b>Stalks (Dried Weight)</b> |
|------------------------------|--------------------------|----------------------------|----------------------------|------------------------------|
| Pleurotus Eryngii (80% OMSW) | 80.9                     | 19.1                       | 67                         | 33                           |
| Pleurotus Eryngii (20% OMSW) | 81.1                     | 18.9                       | 69                         | 31                           |

**Table S2.** Percent of dried weight obtained from *Pleurotus Eryngii* caps and stalks.

| <b>Treatment</b>             | <b>Percent of dried Weight (Caps)</b> | <b>Percent of Dried Weight (Stalks)</b> |
|------------------------------|---------------------------------------|-----------------------------------------|
| Pleurotus Eryngii (80% OMSW) | 10.5                                  | 17.9                                    |
| Pleurotus Eryngii (60% OMSW) | 8.9                                   | 16.1                                    |
| Pleurotus Eryngii (20% OMSW) | 9.8                                   | 16.3                                    |
